# Supplementary material for: Risk and predictors of heart failure in sarcoidosis in a population-based cohort study from Sweden
Source: PubMed Central journal article supplement — Heart. 2021 May 21;108(6):467–73. doi: 10.1136/heartjnl-2021-319129 (PMC8899480; doi:10.1136/heartjnl-2021-319129), 2021-05-21
Supplement: heartjnl-2021-319129supp001.pdf [file heartjnl-2021-319129supp001.pdf]

**SUPPLEMENTAL MATERIAL****Risk and predictors of heart failure in sarcoidosis in a population-based cohort study from Sweden**

Marios Rossides, Susanna Kullberg, Johan Grunewald, Anders Eklund, Daniela Di Giuseppe, Johan Askling, Elizabeth V. Arkema

**Contents**

|                             |    |
|-----------------------------|----|
| SUPPLEMENTAL METHODS .....  | 2  |
| Sensitivity analyses.....   | 2  |
| SUPPLEMENTAL TABLES .....   | 3  |
| Supplemental Table S1 ..... | 3  |
| Supplemental Table S2 ..... | 6  |
| Supplemental Table S3 ..... | 7  |
| Supplemental Table S4 ..... | 8  |
| Supplemental Table S5 ..... | 9  |
| Supplemental Table S6 ..... | 10 |

## SUPPLEMENTAL METHODS

### Sensitivity analyses

We conducted several sensitivity analyses. First, to test whether surveillance bias could explain higher risks of heart failure in sarcoidosis than in comparators, we disregarded heart failure diagnoses during the first six months since start of follow-up (second visit for sarcoidosis in the National Patient Register or corresponding date for comparators) in both groups. In addition, we changed our definition of heart failure to also include secondary discharge diagnoses (in addition to the primary) to test the robustness of the definition of heart failure used in our main analyses.

Second, to investigate the role of immunosuppressant treatment for sarcoidosis on the risk of heart failure, we repeated our analysis of heart failure predictors restricting to individuals diagnosed 2006 and onwards for whom data in the Prescribed Drug Register were available. As in the main analyses, we used a Cox model with time since sarcoidosis diagnosis (second visit for sarcoidosis in the National Patient Register) as the time scale and included treatment status around diagnosis in addition to demographic and clinical covariates.

Third, we examined the effect of systemic corticosteroids that patients were dispensed within six months before, and separately, six months after sarcoidosis diagnosis on the risk of heart failure. We used Cox models restricted to individuals who received at least one defined daily dose during the corresponding six-month period before or after sarcoidosis diagnosis to estimate hazard ratios of heart failure associated with dispensation of 50 defined daily doses of systemic corticosteroids, and separately, comparing high and middle to low tertiles of systemic corticosteroids DDDs. In the analysis of cumulative defined daily doses of systemic corticosteroids that were dispensed within six months before sarcoidosis diagnosis, time zero was the date of sarcoidosis diagnosis (second visit for sarcoidosis in the National Patient Register). In the analysis of cumulative defined daily doses within six months after sarcoidosis diagnosis, we started counting follow-up time six months after sarcoidosis diagnosis. Consequently, the latter analysis was restricted to individuals with sarcoidosis living in Sweden at start of follow-up who by that time had not developed heart failure. Due to small numbers, Cox models in both analyses were adjusted for age, sex, region of residence, country of birth (Nordic or non-Nordic including few missing), and education ( $\leq 9$  years including few missing, 10–12, or  $\geq 13$  years).

Last, in a separate analysis including all individuals with sarcoidosis irrespective of the year of diagnosis, we repeated the mutually adjusted Cox model from in the main analysis this time allowing clinical predictors of heart failure to change value during follow-up (time-varying predictors).

## SUPPLEMENTAL TABLES

**Supplemental Table S1.** International Classification of Diseases (ICD; 1964–2013), medical procedure codes (KVÅ; 1997–2013), and Anatomical Therapeutic Chemical (ATC) codes (July 2005–2013) used to define diseases in the National Patient Register and the Prescribed Drug Register.

| Disease/Medication                                    | Definition                                                                                                                                                                                   | ICD*, KVÅ, and/or ATC codes                                                                                                                       |
|-------------------------------------------------------|----------------------------------------------------------------------------------------------------------------------------------------------------------------------------------------------|---------------------------------------------------------------------------------------------------------------------------------------------------|
| Sarcoidosis                                           | ≥2 inpatient or outpatient visits in the National Patient Register                                                                                                                           | ICD-8/9: 135<br>ICD-10: D86                                                                                                                       |
| Hematopoietic or lung malignancy                      | ≥1 diagnosis ±6 months from first sarcoidosis visit or corresponding date for comparators                                                                                                    | ICD-7: 162; 163; 200–205                                                                                                                          |
| Sarcoidosis treatment status around diagnosis         | ≥1 dispensation ±3 months from first sarcoidosis visit                                                                                                                                       | ATC: H02AB01/02/04/06/07;<br>L01BA01; L04AX01/03                                                                                                  |
| Heart failure                                         | ≥1 inpatient or outpatient visit where the ICD code for heart failure appears as the primary discharge diagnosis                                                                             | ICD-8: 402,99; 425,08; 425,09;<br>427,00; 427,10; 428,99<br>ICD-9: 425A; 425B; 425E; 425X; 428<br>ICD-10: I42.0; I42.1; I42.8; I42.9; I43;<br>I50 |
| Hypertension                                          | History of ≥1 visit or ≥2 dispensations evaluated at three months before the first sarcoidosis visit or corresponding date for comparators (or at start of follow-up when used as predictor) | ICD-8: 401–404<br>ICD-9: 401–405<br>ICD-10: I10–I15<br>ATC: C07; C08; C09                                                                         |
| Diabetes mellitus                                     | Same as hypertension                                                                                                                                                                         | ICD-8/9: 250<br>ICD-10: E10; E11<br>ATC: A10                                                                                                      |
| Dyslipidemia                                          | Same as hypertension                                                                                                                                                                         | ICD-8/9: 272<br>ICD-10: E78<br>ATC: C10                                                                                                           |
| Stroke                                                | History of ≥1 inpatient visit evaluated at three months before the first sarcoidosis visit or corresponding date for comparators                                                             | ICD-8: 430; 431; 432; 433; 434; 436<br>ICD-9: 430; 431; 433; 434; 436<br>ICD-10: I60; I61; I63; I64                                               |
| Heart valve disease                                   | History of ≥1 visit evaluated at three months before the first sarcoidosis visit or corresponding date for comparators (or at start of follow-up when used as predictor)                     | ICD-9: 424A–424D<br>ICD-10: I34–I37<br>KVÅ: FMA; FMC; FMD; FMW; FK                                                                                |
| Ischemic heart disease or acute myocardial infarction | Same as heart valve disease                                                                                                                                                                  | ICD-8/9: 410–414<br>ICD-10: I20–I25                                                                                                               |
| Atrial fibrillation                                   | Same as heart valve disease                                                                                                                                                                  | ICD-8: 427,92<br>ICD-9: 427D<br>ICD-10: I48                                                                                                       |
| Chronic obstructive pulmonary disease                 | Same as heart valve disease                                                                                                                                                                  | ICD-8: 491; 492<br>ICD-9: 491A; 491B; 491X; 492; 496<br>ICD-10: J41–J43; J44.1; J44.8; J44.9                                                      |

Supplemental Table S1. (Continued.)

| Disease/Medication                                                           | Definition                                                                                                                                                                      | ICD*, KVÅ, and/or ATC codes                                                                                                                                                                                                                                                                                                                                                                                                                                                                                                                                                   |
|------------------------------------------------------------------------------|---------------------------------------------------------------------------------------------------------------------------------------------------------------------------------|-------------------------------------------------------------------------------------------------------------------------------------------------------------------------------------------------------------------------------------------------------------------------------------------------------------------------------------------------------------------------------------------------------------------------------------------------------------------------------------------------------------------------------------------------------------------------------|
| Chronic kidney disease                                                       | Same as heart valve disease                                                                                                                                                     | ICD-8: 582–584<br>ICD-9: 585; 586<br>ICD-10: N18; N19; Z49.1 Z49.2<br>KVÅ: DR014; DR015; DR016; DR020;<br>DR012; DR013; DR023; DR024;<br>TJA33; TJA35; KAS00; KAS10; KAS20                                                                                                                                                                                                                                                                                                                                                                                                    |
| Alcohol-related disorders                                                    | Same as heart valve disease                                                                                                                                                     | ICD-8: 303; 571,0; 577,1<br>ICD-9: 305A; 535D; 571A; 571B;<br>571C; 571D; 577B<br>ICD-10: E24.4; F10; G31.2; G62.1;<br>G72.1; K29.2; K70; K86.0; T51                                                                                                                                                                                                                                                                                                                                                                                                                          |
| Autoimmune disease                                                           | History of $\geq 2$ visits evaluated at three months before the first sarcoidosis visit or corresponding date for comparators (or at start of follow-up when used as predictor) | ICD-8: 136,07; 242,00; 245,30;<br>255,10; 269,10; 281,0; 283,90;<br>287,10; 340; 357; 446,20; 446,30;<br>446,38; 563; 694; 696; 704,00; 712;<br>716; 733,00; 734,0; 734,1; 734,9<br>ICD-9: 136B; 242A; 245C; 255E;<br>281A; 283A; 287D; 340; 357A; 358A;<br>446E; 446F; 555; 556; 571G; 579A;<br>694E; 694F; 696; 704A; 710; 714; 720<br>ICD-10: D51.0; D59.1; D68.6; D69.3;<br>E06.3; E05.0; E10; E27.1; G70.0; G35;<br>G61.0; K50; K51; K74.3; K90.0; L10;<br>L12; L40; L63; M05–M09; M31.3;<br>M31.5; M31.6; M32.1; M32.8;<br>M32.9; M33; M34; M35.0; M35.1;<br>M35.2; M45 |
| Other arrhythmia or heart block                                              | History of $\geq 1$ visit or $\geq 2$ dispensations evaluated at start of follow-up (and during follow-up depending on the analysis)                                            | ICD-8: 426; 427,20–427,98<br>ICD-9: 416A; 416B; 426; 427<br>ICD-10: I27.0; I27.2; I44; I45–I47; I49;<br>Z45.0; Z95.0<br>KVÅ: FPE; PPF; FPG<br>ATC: C01B                                                                                                                                                                                                                                                                                                                                                                                                                       |
| Pulmonary hypertension                                                       | History of $\geq 1$ visit evaluated at start of follow-up (and during follow-up depending on the analysis)                                                                      | ICD-8: 426<br>ICD-9: 416A; 416B<br>ICD-10: I27.0; I27.2                                                                                                                                                                                                                                                                                                                                                                                                                                                                                                                       |
| Systemic corticosteroids (defined daily doses analyses)                      | No. dispensed defined daily doses within six months before/after start of follow-up                                                                                             | ATC: H02AB01/02/04/06/07                                                                                                                                                                                                                                                                                                                                                                                                                                                                                                                                                      |
| Angiotensin-converting enzyme inhibitors or angiotensin II receptor blockers | $\geq 1$ dispensation within the period -6 to -3 months from the first sarcoidosis visit or corresponding date for comparators                                                  | ATC: C09                                                                                                                                                                                                                                                                                                                                                                                                                                                                                                                                                                      |
| $\beta$ -blockers                                                            |                                                                                                                                                                                 | ATC: C07                                                                                                                                                                                                                                                                                                                                                                                                                                                                                                                                                                      |
| Calcium channel blockers                                                     |                                                                                                                                                                                 | ATC: C08                                                                                                                                                                                                                                                                                                                                                                                                                                                                                                                                                                      |
| Aldosterone antagonists                                                      |                                                                                                                                                                                 | ATC: C03DA                                                                                                                                                                                                                                                                                                                                                                                                                                                                                                                                                                    |
| High-ceiling diuretics                                                       |                                                                                                                                                                                 | ATC: C03C                                                                                                                                                                                                                                                                                                                                                                                                                                                                                                                                                                     |
| Antidiabetics                                                                |                                                                                                                                                                                 | ATC: A10                                                                                                                                                                                                                                                                                                                                                                                                                                                                                                                                                                      |
| Lipid-lowering medications                                                   |                                                                                                                                                                                 | ATC: C10                                                                                                                                                                                                                                                                                                                                                                                                                                                                                                                                                                      |

**Supplemental Table S1.** (Continued.)

| <b>Disease/Medication</b> | <b>Definition</b>                    | <b>ICD*, KVÅ, and/or ATC codes</b> |
|---------------------------|--------------------------------------|------------------------------------|
| Acetylsalicylic acid      | ≥1 dispensation within the period -6 | ATC: B01AC06                       |
| Warfarin                  | to -3 months from the first          | ATC: B01AA03                       |
| Nitroglycerin             | sarcoidosis visit or corresponding   | ATC: C01DA02/A14                   |
| Digoxin                   | date for comparators                 | ATC: C01AA05                       |

ICD = International Classification of Diseases; ATC = Anatomical Therapeutic Chemical; KVÅ = Swedish classification of medical procedures (Klassifikation av vårdåtgärder).

\*The Swedish ICD classification system's 10<sup>th</sup> revision was in use starting 1997, the 9<sup>th</sup> revision between 1987 and 1996 (and 1997 in some healthcare practices) and the 8<sup>th</sup> revision between 1969 and 1986.

**Supplemental Table S2.** History of dispensation of medications related to heart failure risk at baseline ( $\geq 1$  dispensation in the Prescribed Drug Register within six to three months before the first sarcoidosis visit in the National Patient Register or corresponding period for matched general population comparators). Evaluated in individuals who entered the cohort from January 1, 2006 and onwards for whom data in the Prescribed Drug Register were available.

|                                                                            | <b>Sarcoidosis</b> | <b>General population</b> |
|----------------------------------------------------------------------------|--------------------|---------------------------|
| Individuals                                                                | 6585               | 64 599                    |
| Angiotensin-converting enzyme inhibitor or angiotensin II receptor blocker | 689 (10.5)         | 5319 (8.2)                |
| $\beta$ -blocker                                                           | 647 (9.8)          | 4790 (7.4)                |
| Calcium channel blocker                                                    | 365 (5.5)          | 2727 (4.2)                |
| Aldosterone antagonist                                                     | 43 (0.7)           | 281 (0.4)                 |
| High-ceiling diuretic                                                      | 212 (3.2)          | 931 (1.4)                 |
| Antidiabetic including insulin                                             | 385 (5.8)          | 2062 (3.2)                |
| Lipid-lowering medication                                                  | 572 (8.7)          | 4121 (6.4)                |
| Acetylsalicylic acid                                                       | 417 (6.3)          | 3199 (5.0)                |
| Warfarin                                                                   | 95 (1.4)           | 554 (0.9)                 |
| Nitroglycerin                                                              | 85 (1.3)           | 640 (1.0)                 |
| Digoxin                                                                    | 18 (0.3)           | 116 (0.2)                 |

Data are n or n (%).

**Supplemental Table S3.** Hazard ratios of heart failure comparing sarcoidosis to the general population from sensitivity analyses.

|                                                                                            | <b>Sarcoidosis</b> | <b>General population</b> |
|--------------------------------------------------------------------------------------------|--------------------|---------------------------|
| <b>Excluding diagnoses of heart failure during the first six months of follow-up</b>       |                    |                           |
| <b>Overall</b>                                                                             |                    |                           |
| Events/N at risk                                                                           | 182/7994           | 663/78 360                |
| Incidence rate* (95% CI)                                                                   | 2.2 (1.8, 2.6)     | 0.8 (0.7, 0.9)            |
| Hazard ratio† (95% CI)                                                                     | 2.30 (1.94, 2.74)  | 1.00 [Reference]          |
| <b>≤2 years since sarcoidosis diagnosis</b>                                                |                    |                           |
| Events/N at risk                                                                           | 72/7994            | 172/78 360                |
| Hazard ratio† (95% CI)                                                                     | 3.50 (2.64, 4.63)  | 1.00 [Reference]          |
| <b>&gt;2 years since sarcoidosis diagnosis</b>                                             |                    |                           |
| Events/N at risk                                                                           | 110/6597           | 491/65 447                |
| Hazard ratio† (95% CI)                                                                     | 1.90 (1.53, 2.35)  | 1.00 [Reference]          |
| <b>Heart failure from main and contributory diagnoses in the National Patient Register</b> |                    |                           |
| Events/N at risk                                                                           | 258/8465           | 1154/82 713               |
| Incidence rate* (95% CI)                                                                   | 2.6 (2.3, 3.1)     | 1.2 (1.0, 1.3)            |
| Hazard ratio† (95% CI)                                                                     | 1.87 (1.62, 2.15)  | 1.00 [Reference]          |

CI = confidence interval.

Data are n unless otherwise stated.

\*Rates per 1000 person-years were estimated using Poisson regression models adjusted for age, sex, and region of residence.

†Hazard ratios were estimated using Cox proportional hazards models with attained age as the time scale and adjusted for age at start of follow-up, sex, region of residence, country of birth, education, civil status, calendar period, healthcare visits within two years before inclusion, history of hypertension, diabetes mellitus, dyslipidemia, heart valve disease, atrial fibrillation, chronic obstructive pulmonary disease, chronic kidney disease, alcohol-related disorders, and autoimmune disease.

**Supplemental Table S4.** Hazard ratios of heart failure in individuals with sarcoidosis diagnosed 2006–2013 associated with covariates evaluated at start of follow-up (second visit for sarcoidosis in the National Patient Register).

|                                                       | Heart failure  |                | Hazard ratio*<br>(95% CI) |
|-------------------------------------------------------|----------------|----------------|---------------------------|
|                                                       | Yes<br>(n=141) | No<br>(n=6444) |                           |
| Median age at sarcoidosis diagnosis† (IQR), years     | 67 (58, 77)    | 48 (38, 61)    | 1.8 (1.6, 2.2)            |
| Male                                                  | 82 (58)        | 3557 (55)      | 1.7 (1.2, 2.4)            |
| Education‡, years                                     |                |                |                           |
| ≤9                                                    | 61 (43)        | 1357 (21)      | 1.8 (1.1, 3.0)            |
| 10–12                                                 | 58 (41)        | 3207 (50)      | 1.4 (0.8, 2.3)            |
| ≥13                                                   | 22 (16)        | 1880 (29)      | 1.0 [Reference]           |
| Hypertension                                          | 86 (61)        | 1643 (25)      | 1.2 (0.8, 1.8)            |
| Diabetes mellitus                                     | 46 (33)        | 519 (8)        | 2.4 (1.6, 3.6)            |
| Chronic kidney disease                                | 12 (9)         | 144 (2)        | 1.4 (0.7, 2.6)            |
| Alcohol-related disease                               | 7 (5)          | 167 (3)        | 1.6 (0.7, 3.5)            |
| Chronic obstructive pulmonary disease                 | 9 (6)          | 176 (3)        | 1.2 (0.6, 2.4)            |
| Heart valve disease                                   | 10 (7)         | 68 (1)         | 1.5 (0.8, 3.0)            |
| Ischemic heart disease or acute myocardial infarction | 38 (27)        | 277 (4)        | 1.9 (1.2, 2.9)            |
| Atrial fibrillation                                   | 32 (23)        | 183 (3)        | 2.2 (1.3, 3.6)            |
| Other arrhythmia or heart block                       | 28 (20)        | 242 (4)        | 2.2 (1.3, 3.5)            |
| Pulmonary hypertension                                | ≤5 (1)         | 7 (<1)         | Not estimable             |
| Autoimmune disease                                    | 24 (17)        | 554 (9)        | 1.5 (1.0, 2.5)            |
| Sarcoidosis treatment around diagnosis                | 62 (44)        | 2634 (41)      | 1.2 (0.8, 1.7)            |

CI = confidence interval; IQR = interquartile range.

Data are n (%) or mean (standard deviation) unless otherwise stated. Category percentages may not sum up to 100 owing to rounding.

\*Hazard ratios were estimated from a Cox proportional hazards model with years since sarcoidosis diagnosis as the time scale that included the covariates age (continuous), sex, region of residence (six healthcare regions), country of birth (Nordic/non-Nordic), education, sarcoidosis treatment around diagnosis (yes/no), and all comorbidities in the table except pulmonary hypertension due to small numbers.

†Effect per 10-year increase.

‡Category “≤9 years” includes <1% missing.



**Supplemental Table S5.** Hazard ratios of heart failure in individuals with sarcoidosis diagnosed 2006–2013 associated with dispensed defined daily doses of systemic corticosteroids within six months before or six months after sarcoidosis diagnosis (second visit for sarcoidosis in the National Patient Register).

|                                                                                                       | Heart failure  |                | Hazard ratio*<br>(95% CI) |
|-------------------------------------------------------------------------------------------------------|----------------|----------------|---------------------------|
|                                                                                                       | Yes            | No             |                           |
| <b>Defined daily doses of systemic corticosteroids within six months before sarcoidosis diagnosis</b> |                |                |                           |
| Individuals                                                                                           | 49             | 2000           |                           |
| Mean† (SD)                                                                                            | 180 (136)      | 172 (138)      | 1.0 (0.9, 1.1)            |
| Median (IQR)                                                                                          | 150 (100, 250) | 150 (75, 208)  |                           |
| Low tertile ( $\leq 100$ )                                                                            | 21 (43)        | 926 (46)       | 1.0 [Reference]           |
| Mid tertile (101– $\leq 200$ )                                                                        | 14 (29)        | 573 (29)       | 0.9 (0.4, 1.7)            |
| High tertile ( $> 200$ )                                                                              | 14 (29)        | 501 (25)       | 1.1 (0.6, 2.2)            |
| <b>Defined daily doses of systemic corticosteroids within six months after sarcoidosis diagnosis</b>  |                |                |                           |
| Individuals                                                                                           | 59             | 2255           |                           |
| Mean† (SD)                                                                                            | 306 (221)      | 257 (191)      | 1.1 (1.0, 1.1)            |
| Median (IQR)                                                                                          | 300 (146, 400) | 200 (100, 373) |                           |
| Low tertile ( $\leq 150$ )                                                                            | 18 (31)        | 839 (37)       | 1.0 [Reference]           |
| Mid tertile (151– $\leq 300$ )                                                                        | 15 (25)        | 772 (34)       | 0.8 (0.4, 1.6)            |
| High tertile ( $> 300$ )                                                                              | 26 (44)        | 644 (29)       | 2.1 (1.1, 3.8)            |

CI = confidence interval; SD = standard deviation; IQR = interquartile range.

Data are n (%) unless otherwise stated. Category percentages may not sum up to 100 owing to rounding.

\*Hazard ratios were estimated from Cox proportional hazards models with years since sarcoidosis diagnosis as the time scale and adjusted for age (continuous), sex, region of residence (six healthcare regions), country of birth (Nordic/non-Nordic including missing), and education ( $\leq 9$  years including missing/10–12/ $\geq 13$  years).

†Effect per 50 defined daily doses of systemic corticosteroids.

**Supplemental Table S6.** Hazard ratios of heart failure in individuals with sarcoidosis associated with covariates evaluated at start and during follow-up.

|                                                       | Heart failure  |                | Hazard ratio*<br>(95% CI) |
|-------------------------------------------------------|----------------|----------------|---------------------------|
|                                                       | Yes<br>(n=204) | No<br>(n=8370) |                           |
| Median age at sarcoidosis diagnosis† (IQR), years     | 67 (59, 76)    | 48 (37, 60)    | 1.6 (1.4, 1.8)            |
| Male                                                  | 114 (56)       | 4636 (55)      | 1.4 (1.0, 1.8)            |
| Education‡, years                                     |                |                |                           |
| ≤9                                                    | 98 (48)        | 1781 (21)      | 2.0 (1.3, 3.0)            |
| 10–12                                                 | 73 (36)        | 4129 (49)      | 1.3 (0.9, 2.0)            |
| ≥13                                                   | 33 (16)        | 2460 (29)      | 1.0 [Reference]           |
| Hypertension                                          | 157 (77)       | 2971 (35)      | 1.8 (1.2, 2.6)            |
| Diabetes mellitus                                     | 77 (38)        | 992 (12)       | 2.2 (1.6, 3.1)            |
| Chronic kidney disease                                | 31 (15)        | 324 (4)        | 1.5 (1.0, 2.3)            |
| Alcohol-related disease                               | 11 (5)         | 275 (3)        | 1.7 (0.9, 3.2)            |
| Chronic obstructive pulmonary disease                 | 22 (11)        | 387 (5)        | 1.6 (1.0, 2.6)            |
| Heart valve disease                                   | 24 (12)        | 142 (2)        | 1.6 (1.0, 2.6)            |
| Ischemic heart disease or acute myocardial infarction | 70 (34)        | 540 (6)        | 1.9 (1.4, 2.6)            |
| Atrial fibrillation                                   | 72 (35)        | 385 (5)        | 2.7 (1.9, 3.8)            |
| Other arrhythmia or heart block                       | 62 (30)        | 489 (6)        | 3.1 (2.2, 4.3)            |
| Pulmonary hypertension                                | ≤5 (2)         | 22 (<1)        | Not estimable             |
| Autoimmune disease                                    | 39 (19)        | 981 (12)       | 1.1 (0.8, 1.6)            |

CI = confidence interval; IQR = interquartile range.

Data are n (%) or mean (standard deviation) unless otherwise stated. Category percentages may not sum up to 100 owing to rounding.

\*Hazard ratios were estimated from a Cox proportional hazards model with years since sarcoidosis diagnosis as the time scale that included the covariates age (continuous), sex, region of residence (six healthcare regions), country of birth (Nordic/non-Nordic), education, and all comorbidities in the table as time-varying covariates except pulmonary hypertension due to small numbers.

†Effect per 10-year increase.

‡Category “≤9 years” includes <1% missing.
